# Supplementary figures and images for: Power to Detect Risk Alleles Using Genome-Wide Tag SNP Panels
Source: PLOS journal article supplement (doi:10.1371/journal.pgen.0030170), 2007-09-28

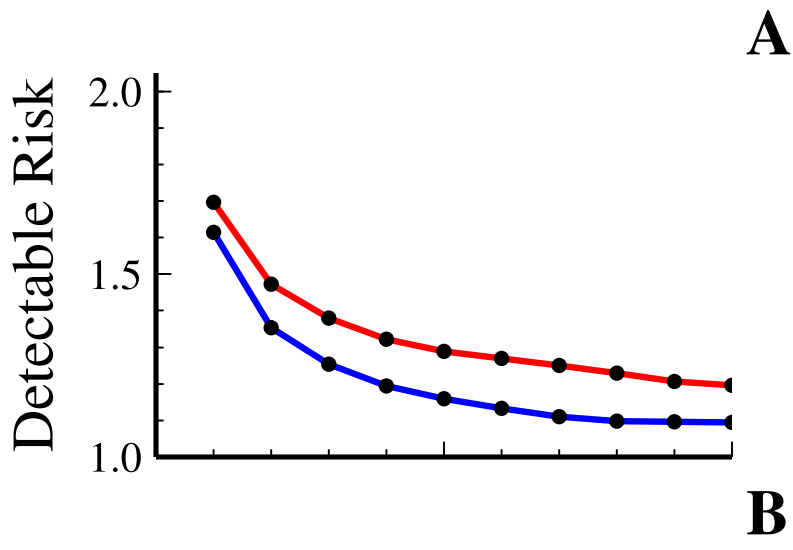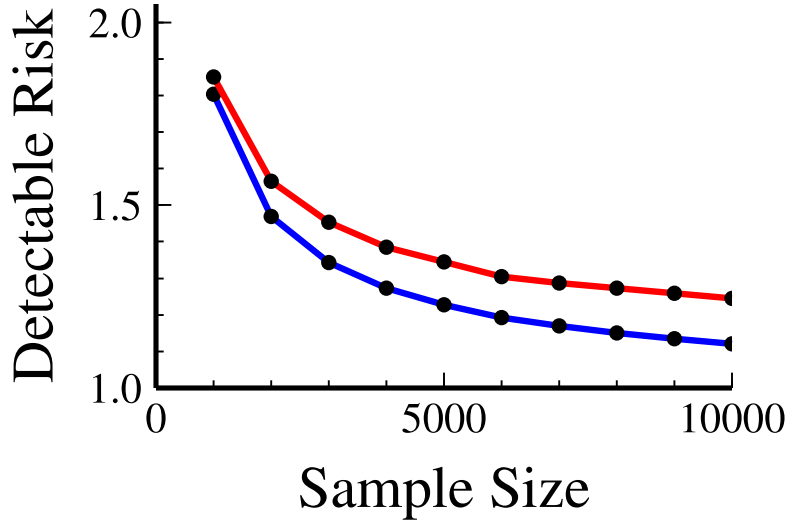

Supplement: S2 (10.1371/journal.pgen.0030170.s002) [file journal.pgen.0030170.s002]

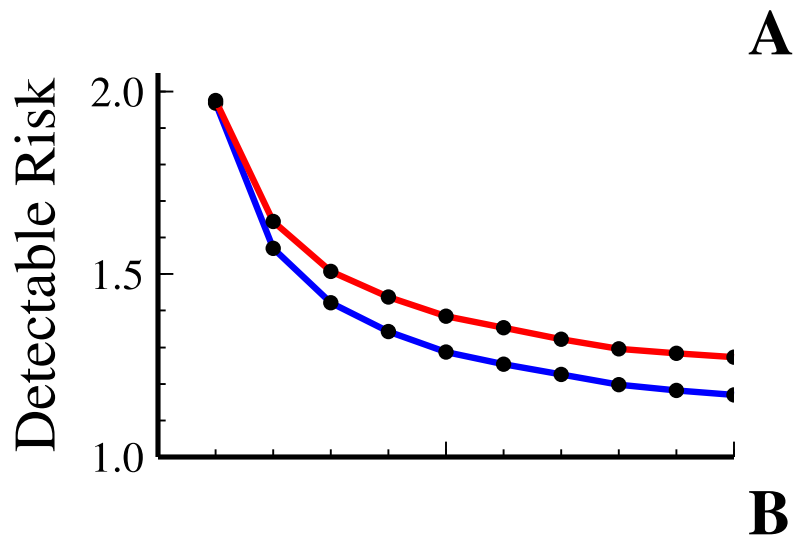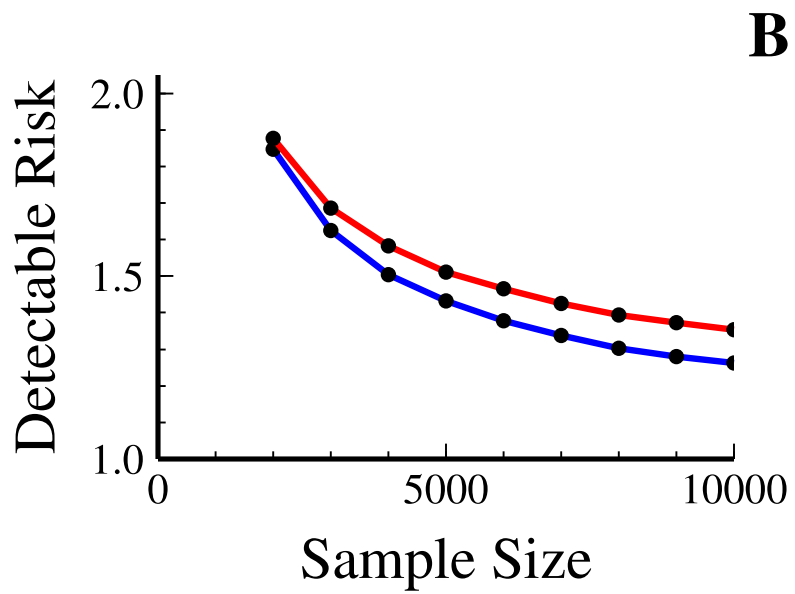

Supplement: S4 (10.1371/journal.pgen.0030170.s004) [file journal.pgen.0030170.s004]
